# Supplementary material
Source: Royal Society of Chemistry journal article supplement (doi:10.1039/d6ta00929h)
Supplement: d6ta00929h1.pdf [file d6ta00929h1.pdf]

## **Supporting Information**

**Triple-Function of Hydroxyacetone in Suppressing Water Activity Toward  
Long-Lived Aqueous Zinc-Ion Batteries**

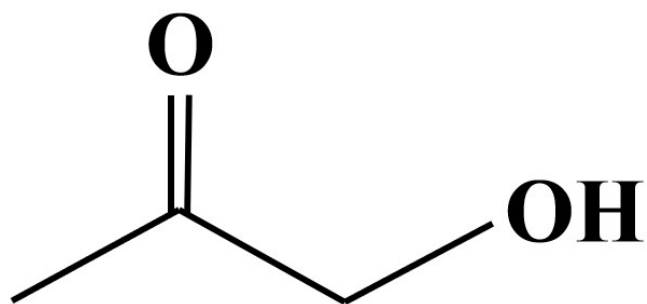

**Fig. S1.** Schematic diagram of hydroxyacetone structure.

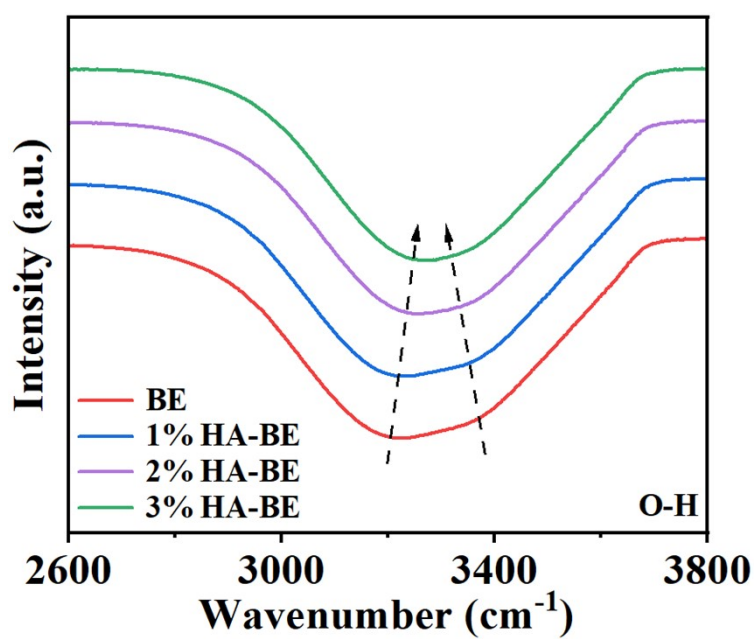

**Fig. S2.** FTIR spectra of O-H bond stretching vibrations for different HA concentrations.

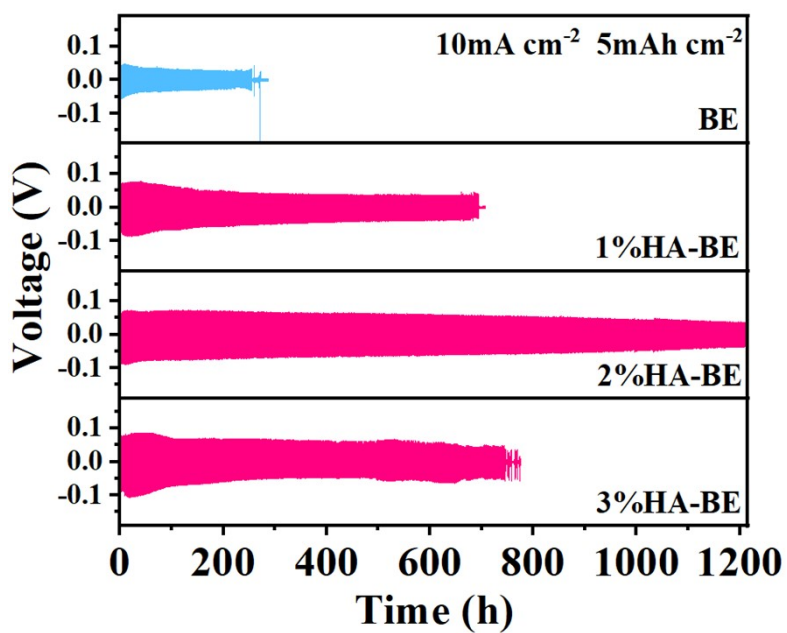

Fig. S3. Constant current cycling of Zn||Zn symmetric cells with different electrolytes.

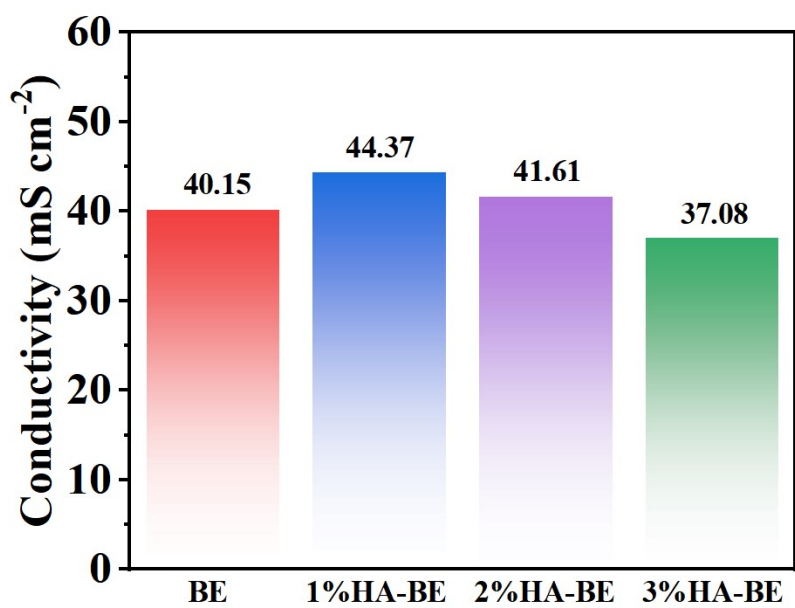

Fig. S4. Ionic conductivity of different electrolytes.

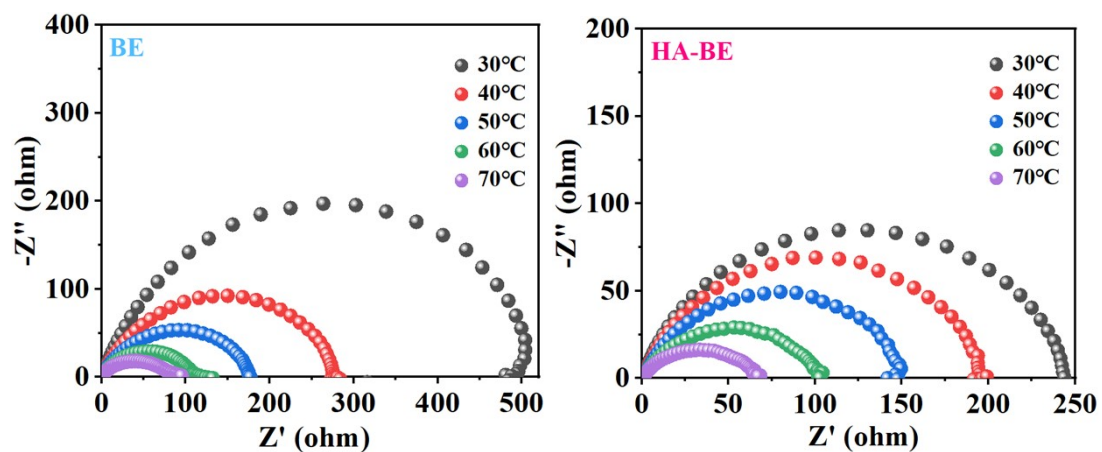

**Fig. S5.** Impedance of Zn||Zn symmetric cells with the two different electrolytes at different temperatures.

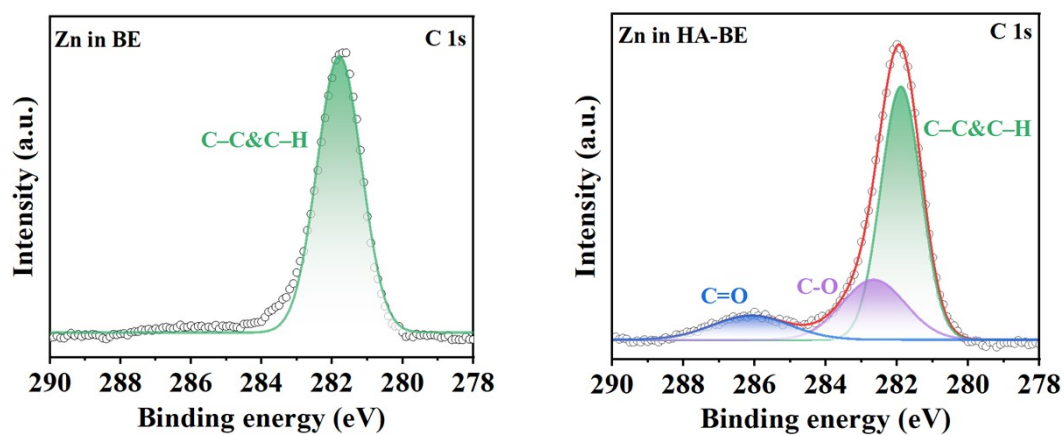

**Fig. S6.** XPS images of Zn foils immersed in different electrolytes for 5 days.

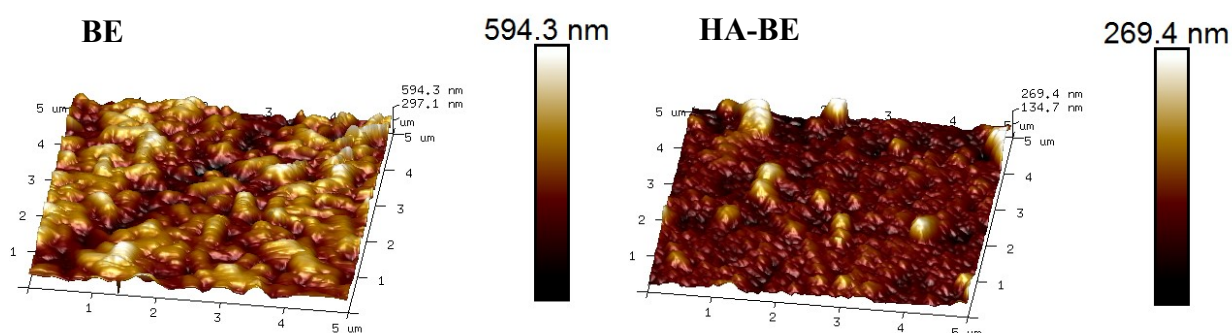

**Fig. S7.** AFM images of Zn foils immersed in different electrolytes for 5 days.

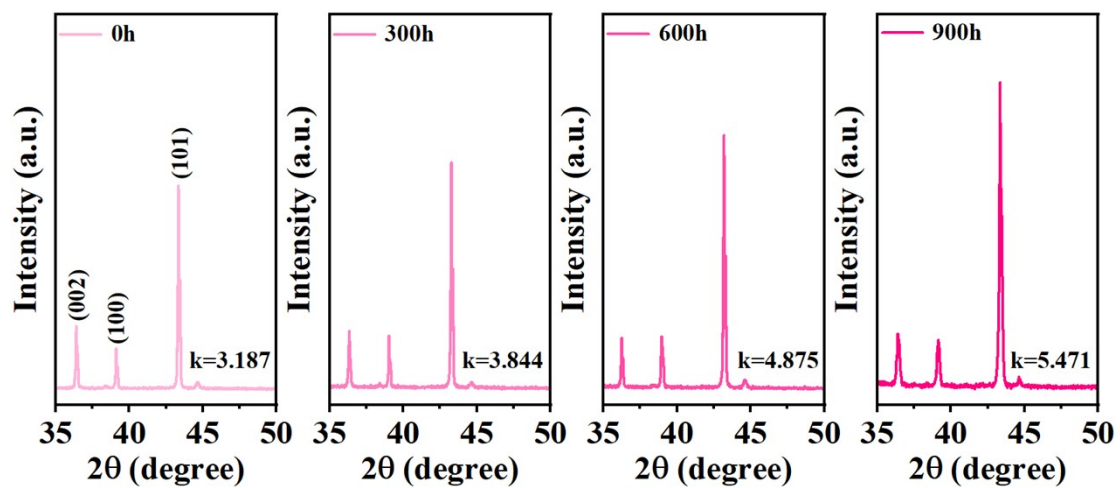

**Fig. S8.** XRD patterns of the Zn anode harvested at the charged state after cycling in HA-BE at different times.

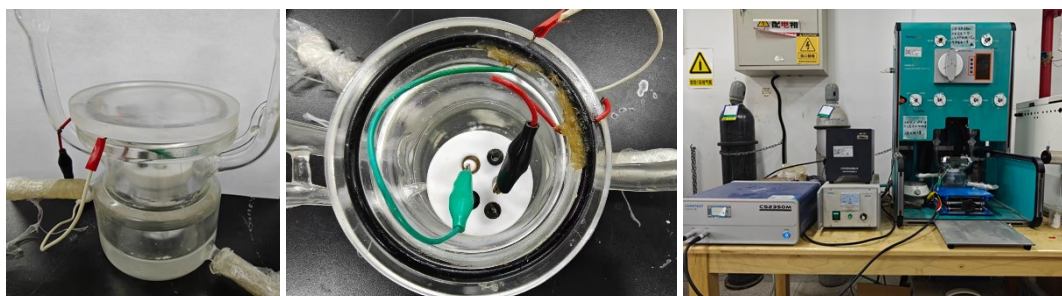

**Fig. S9.** In situ electrochemical gas chromatography.

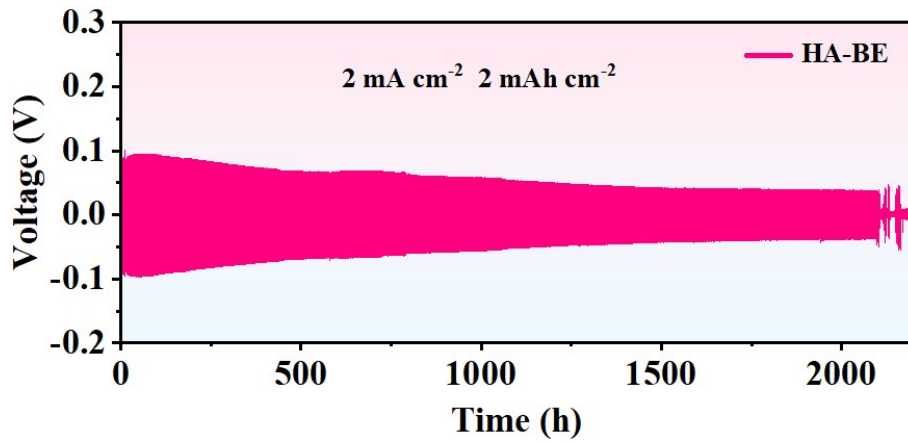

**Fig. S10.** Cycling performance of Zn||Zn symmetric cells at  $2 \text{ mA cm}^{-2}$  and  $2 \text{ mAh cm}^{-2}$ .

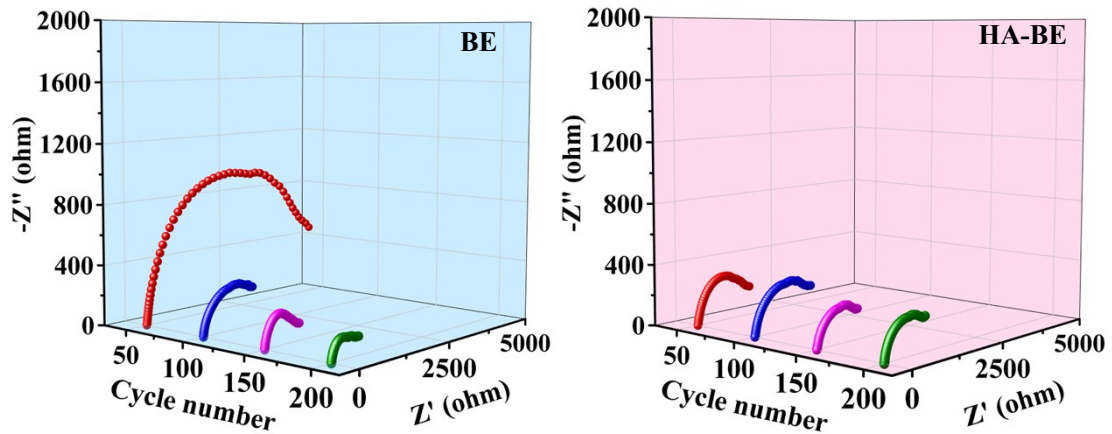

**Fig. S11.** EIS of Zn||Zn symmetric cells with the two different electrolytes after different cycles.

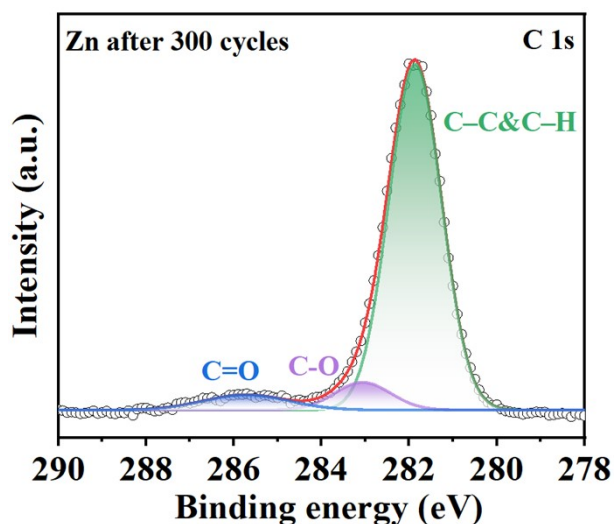

Fig. S12. XPS image of Zn anode after 300 cycles in HA-BE.

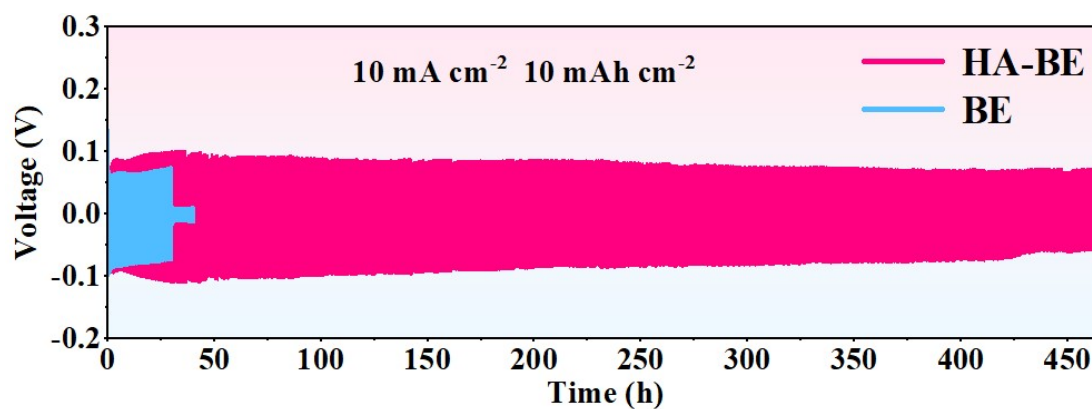

Fig. S13. Cycling performance of Zn||Zn symmetric cells at  $10 \text{ mA cm}^{-2}$  and  $10 \text{ mAh cm}^{-2}$ .

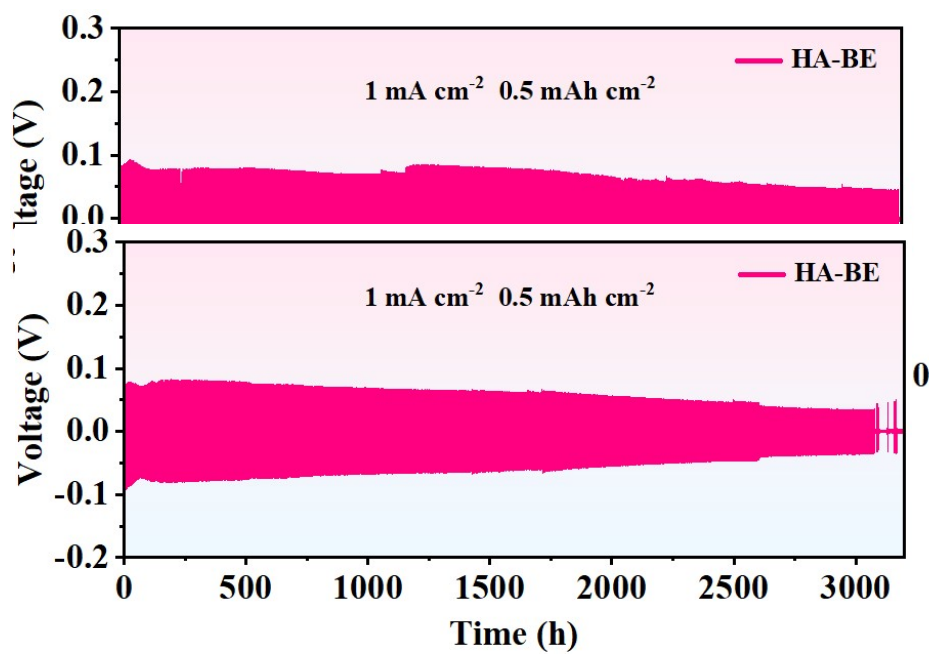

Fig. S14. Parallel tests of Zn||Zn symmetric cells at  $1 \text{ mA cm}^{-2}$  and  $0.5 \text{ mAh cm}^{-2}$ .

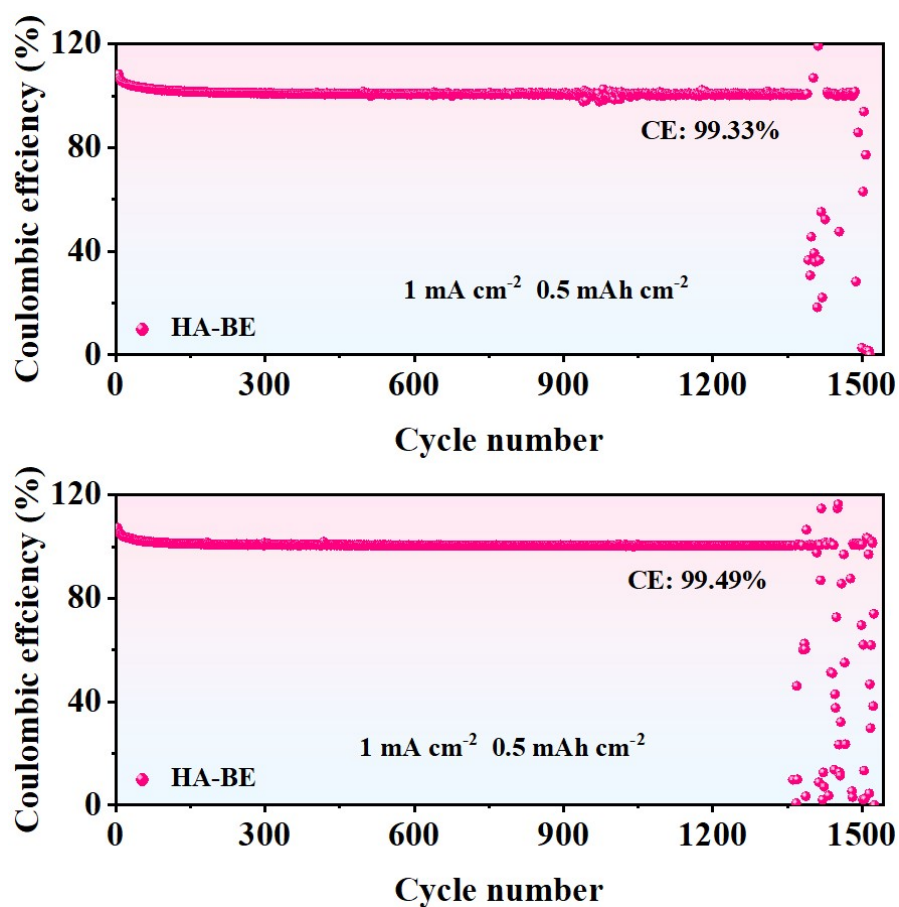

Fig. S15. Parallel tests of Zn||Cu half cells at  $1 \text{ mA cm}^{-2}$  and  $0.5 \text{ mAh cm}^{-2}$ .

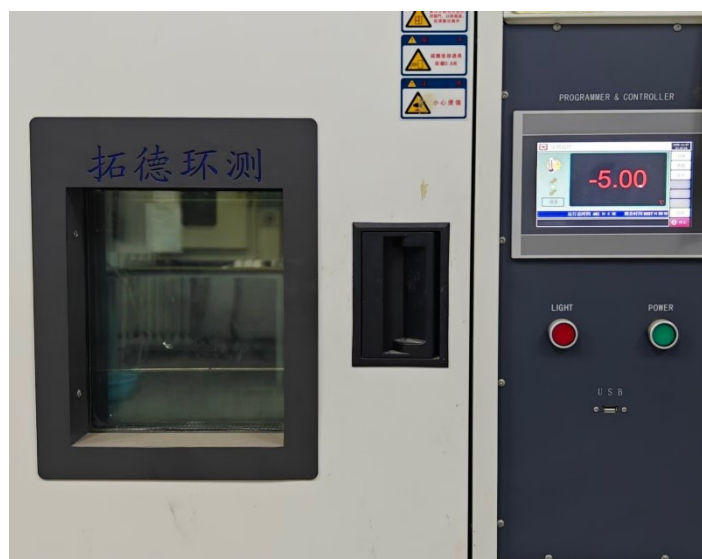

Fig. S16. YH-80R environmental test chamber.

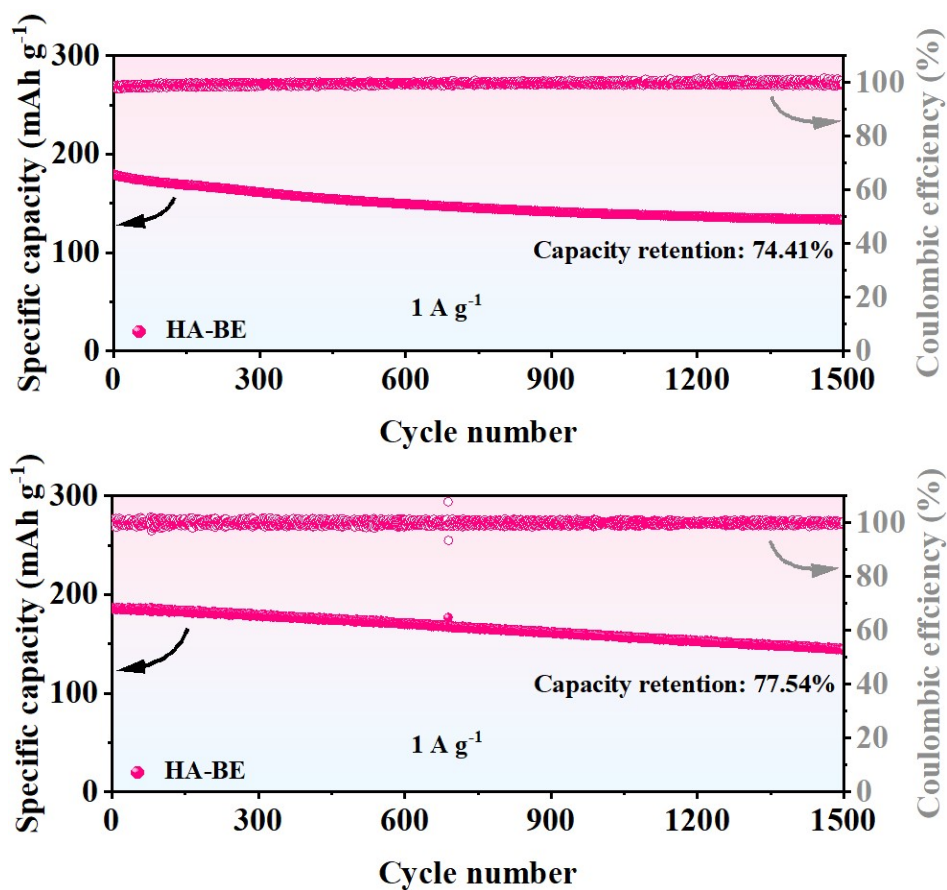

Fig. S17. Parallel tests of Zn||MnO<sub>2</sub> full cells at 1 A g<sup>-1</sup>.

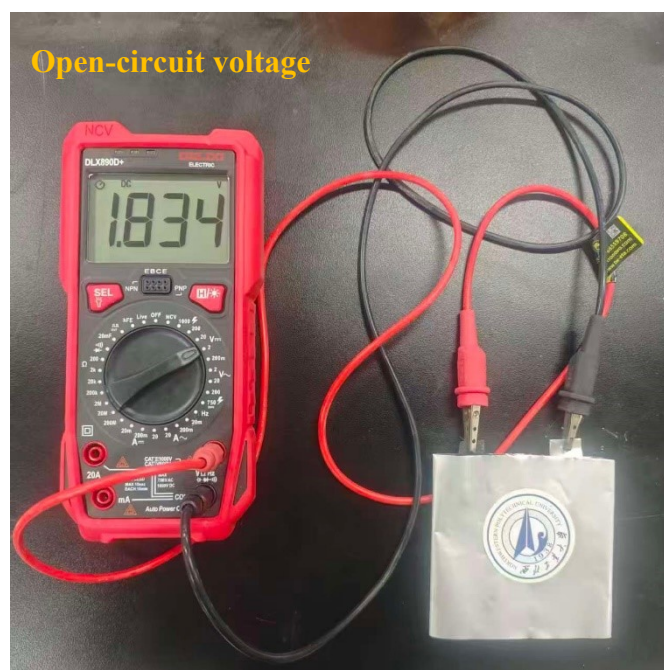

Fig. S18. The open-circuit voltage of Zn||MnO<sub>2</sub> pouch cell.

**Table S1** Comparison of cycle life in this work with other literatures based on electrolyte additives.

| Electrolyte additive                      | Current density and capacity                          | Lifespan | CE and cycle | Reference        |
|-------------------------------------------|-------------------------------------------------------|----------|--------------|------------------|
| TMB<br>(Trifluoro borate)                 | 1.0 mA cm <sup>-2</sup> ,<br>1.0 mAh cm <sup>-2</sup> | 1800 h   | 99.63%       | [1]              |
| CLE<br>(Cellulose levulinate ester)       | 1.0 mA cm <sup>-2</sup> ,<br>1.0 mAh cm <sup>-2</sup> | 2800 h   |              | [2]              |
| THL<br>(Trehalose)                        | 1.0 mA cm <sup>-2</sup> ,<br>1.0 mAh cm <sup>-2</sup> | 1500 h   | 99.8%        | [3]              |
| MAAC<br>(Methylammonium acetate)          | 1.0 mA cm <sup>-2</sup> ,<br>0.5 mAh cm <sup>-2</sup> | 2000 h   | 99.5%, 700   | [4]              |
| AN<br>(Acetonitrile)                      | 1.0 mA cm <sup>-2</sup> ,<br>1.0 mAh cm <sup>-2</sup> | 1300 h   | 99.3%, 600   | [5]              |
| TEG<br>(Triethylene glycol)               | 1.0 mA cm <sup>-2</sup> ,<br>1.0 mAh cm <sup>-2</sup> | 2000 h   |              | [6]              |
| GL<br>(Glucose)A                          | 1.0 mA cm <sup>-2</sup> ,<br>1.0 mAh cm <sup>-2</sup> | 3200 h   | 99.8%, 400   | [7]              |
| SADS<br>(Disodium Succinate)              | 1.0 mA cm <sup>-2</sup> ,<br>1.0 mAh cm <sup>-2</sup> | 2200 h   | 99.24%       | [8]              |
| TDFND<br>(Tetradecafluorononane-1,9-diol) | 1.0 mA cm <sup>-2</sup> ,<br>1.0 mAh cm <sup>-2</sup> | 1250 h   | 99.8%        | [9]              |
| HA<br>(Hydroxyacetone)                    | 1.0 mA cm <sup>-2</sup> ,<br>0.5 mAh cm <sup>-2</sup> | 3200 h   | 99.27%, 1500 | <b>This work</b> |

- [1] G. G. Wang, Y. C. Wang, L. B. Yao, J. H. Yang, X. W. Chi and Y. Liu, *Energy Storage Materials*, 2024, **70**.
- [2] K. Chen, Y. M. Chen, Y. Z. Xu, M. W. Xu, Y. Li, S. Yang, Q. Wu, Q. Q. Xu, H. B. Xie and J. Huang, *Energy Storage Materials*, 2024, **71**.
- [3] H. Y. Li, Y. Ren, Y. Zhu, J. M. Tian, X. Y. Sun, C. C. Sheng, P. He, S. H. Guo and H. S. Zhou, *Angewandte Chemie-International Edition*, 2023, **62**.
- [4] L. L. Zheng, H. H. Li, X. Wang, Z. Chen, C. Hu, K. D. Wang, G. L. Guo, S. Passerini and H. Zhang, *Acs Energy Letters*, 2023, **8**, 2086-2096.
- [5] J. Q. Shi, K. X. Xia, L. J. Liu, C. Liu, Q. Zhang, L. Li, X. Z. Zhou, J. Liang and Z. L. Tao, *Electrochimica Acta*, 2020, **358**.
- [6] Y. Li, J. Cheng, D. Zhao, S. Li, G. Sun, S. Qiao, W. Zhang and Q. Zhu, 2023.
- [7] Y. L. Ji, R. H. Jiang, X. Q. Mai, X. Q. Zhang, S. Lu, X. S. Wang, M. Guo, J. D. Ying, Q. Shen, Y. Q. Wang, Z. X. Yu and T. C. Liu, *Dalton Transactions*, 2025, **54**, 16745-16753.
- [8] Y. Ding, L. Yin, T. Du, Y. X. Wang, Z. He, J. A. Yuwono, G. J. Li, J. W. Liu, S. L. Zhang, T. Yang and Z. P.

Guo, *Advanced Functional Materials*, 2024, **34**.

- [9] T. T. Li, S. L. Hu, C. G. Wang, D. Wang, M. W. Xu, C. Y. Chang, X. J. Xu and C. P. Han, *Angewandte Chemie-International Edition*, 2023, **62**.
